# Supplementary material for: Future Bloom and Blossom Frost Risk for Malus domestica Considering Climate Model and Impact Model Uncertainties
Source: PubMed Central journal article supplement (PMC3792985; doi:10.1371/journal.pone.0075033), 2013-10-08
Supplement: pone.0075033.s001.pdf [file pone.0075033.s001.pdf]

# Future bloom and blossom frost risk for *Malus domestica* considering climate model and impact model uncertainties

Holger Hoffmann<sup>1\*</sup>, Thomas Rath,

Biosystems Engineering, Institute for Biological Production Systems, Leibniz Universität Hannover, Hannover, Germany

<sup>1</sup> Present address: Institute of Crop Science and Resource Conservation, University of Bonn, Bonn, Germany

\* E-mail: Corresponding hhoffmann@uni-bonn.de

## Phenological models supplementary S1

### Projection of temperature

Temperature time series are presented as anomaly from the 1971-2000 mean as indicated by  $\Delta T$ . The anomaly of single years as well as of 10 year moving average time series is shown. By way of example, the latter was calculated as:

$$\Delta T_{y1,y2,s} = \frac{1}{10} \sum_{i=-4}^5 \frac{1}{n} \sum_{d=1}^n T_{y2+i,d,s} - \frac{1}{30} \sum_{i=-14}^{15} \frac{1}{n} \sum_{d=1}^n T_{y1+i,d,s} \text{ with} \quad (1)$$

$\Delta T_{y1,y2,s}$  : projected change in year-mean air temperature from year  $y1$  to year  $y2$  of every grid point  $s$  in Lower Saxony, [-]

$y1, y2$  : year of calculation (past, future)

$s$  : grid point

$i$  : index

$d$  : day

$n$  : number of days of the year (365 or 366)

### Projection of bloom

The change in blooming date  $\Delta t_2$  was calculated as the difference in the 30-year-mean for each grid point:

$$\Delta t_{2y1,y2,s} = \frac{1}{30} \cdot \sum_{i=-14}^{15} t_{2y2+i,s} - \frac{1}{30} \cdot \sum_{i=-14}^{15} t_{2y1+i,s} \text{ with} \quad (2)$$

$\Delta t_{2y1,y2,s}$  : projected change in blooming date  $t_2$  from year  $y1$  to year  $y2$  of every grid point  $s$  in Lower Saxony, [-]

$y1, y2$  : year of calculation (past, future)

$s$  : grid point

$i$  : index

Years with unfulfilled chilling were recorded by counting years without bloom or bloom projected for DOY > 200 as fraction of occurrences in a 30-year-mean:

18

$$\chi_y = \frac{1}{30} \cdot \sum_{i=-14}^{15} \mu_i \text{ with} \quad (3)$$

$$\mu_i = \begin{cases} 1 & \text{if } t_{2,y+i} > 200 \\ 0 & \text{else} \end{cases}$$

$\chi$  : Fraction of years with unfulfilled chilling requirement, [-]  
 $t_{2,y}$  : onset of phenophase in year  $y$ , [DOY]  
 $y$  : year of calculation, e.g. 1980  
 $i$  : index

## 19 Calculation of probability mass functions

20 The values of probability mass functions were estimated non-parametrically by applying a Gaussian  
 21 kernel:

$$pdf(x) = \sum_{s=1}^n \frac{1}{nh\sqrt{2\pi}} e^{-\frac{(x-\Delta\theta_{y1,y2,s})^2}{2h^2}} \text{ with} \quad (4)$$

$h = 0.03$   
 $pdf(x)$  : probability density function value over all grid points, [-]  
 $\Delta\theta_{y1,y2,s}$  : projected change in blossom frost risk  
 $x$  : any possible value of  $\Delta\theta_{y1,y2,s}$ , [-]  
 $h$  : bandwidth of kernel smoothing window, [-]  
 $s$  : grid point  
 $n$  : number of grid points

$$pmf(x) = \frac{pdf(x)}{\sum_{j=1}^z pdf(j)}, \text{ with} \quad (5)$$

$pmf(x)$  : probability mass function value over all grid points, [-]  
 $z$  : number of possible values of  $\Delta\theta_{y1,y2,s}$ , [-]  
 $j$  : index

## 22 Model description

23 Apple bloom was simulated using phenological models. In principle, models assume that the time of  
 24 bloom is related to so-called temperature sums of chilling ( $Sc$ ) and forcing ( $Sf$ ), accumulated during  
 25 winter (chilling phase) and spring (forcing phase) by the corresponding rates of chilling ( $Rc$ ) and forcing  
 26 ( $Rf$ ). See tab. 1 for denominations.

$$Sc(t) = \sum_{i=t_0}^t Rc(T_i) \quad (6)$$

$$Sf(t) = \sum_{i=t_1}^{t_2} Rf(T_i) \quad (7)$$

Further it is assumed, that  $Sf$  is related to  $Sc$  as follows:

$$\text{Sequential models: } Sf(t_2) = a \cdot e^{bSc(t_1)} \quad (8)$$

$$\text{Parallel models: } Sf(t_2) = a \cdot e^{bSc(t_2)} \quad (9)$$

27 A basic thermal-time model (model 1) was applied as described, with the rate of forcing  $Rf$ :

28

29 **Model 1**

$$Rf(T_i) = \begin{cases} 0 & \text{if } T_i \leq Tbf \\ T_i - Tbf & \text{else} \end{cases} \quad (10)$$

30 Sequential (model 2) and parallel (model 3) chilling-forcing models were applied as described in the fol-  
31 lowing:

32

33 **Models 2,3**

$$Rc(T_i) = \begin{cases} 0 & \text{if } T_i \leq 0 \text{ or } T_i \geq 10 \\ \frac{T_i}{Tbc} & \text{if } 0 < T_i \leq Tbc \\ \frac{T_i - 10}{Tbc - 10} & \text{if } Tbc < T_i < 10 \end{cases} \quad (11)$$

$$Rf(T_i) = \begin{cases} 0 & \text{if } T_i \leq Tbf \\ \frac{28.4}{1 + e^{(-0.185(T_i - Tbf - 18.4))}} & \text{else} \end{cases} \quad (12)$$

34

35 The Modified Utah model was applied for mean daily temperature values (model 4). Following a different  
36 approach, this model is a sequential model with  $Rc$  as in eq. 11 and with  $Rf$  being:

37

38 **Model 4**

$$Rf(T_i) = \begin{cases} 0 & \text{if } T_i \leq Tbf \\ (T_i - Tbf) \cdot \left[ 1 + \left( \frac{Sf(T_{i-1})}{Sf(t_2)} \right)^2 \right] & \text{else} \end{cases} \quad (13)$$

39

40 Due to findings for better performance when relating bloom additionally to radiation, models taking into  
41 account the length of the day were further included (models 5-7). Model 5 was applied in the version  
42 described, and being an extension of model 1 the rate of forcing is calculated as follows:

43

44 **Model 5**

$$Rf(T_i) = \begin{cases} 0 & \text{if } T_i \leq Tbf \\ (T_i - Tbf) \cdot \left( \frac{D}{10} \right)^c & \text{else} \end{cases} \quad (14)$$

45 Models 6-7 are new variations of the sequential and parallel chilling-forcing models. These varied models  
46 also assume, that bloom is influenced by radiation only during the forcing phase. For both  $Rc$  was cal-  
47 culated as in eq. 11 and  $Rf$  was calculated as follows:

48

49 **Model 6,7**

$$Rf(T_i) = \begin{cases} 0 & \text{if } T_i \leq Tbf \\ \frac{28.4}{1 + e^{(-0.185(T_i - Tbf - 18.4))}} \cdot \left( \frac{D}{10} \right)^c & \text{else} \end{cases} \quad (15)$$

**Table 1. Denomination of variables and parameters**

| Notation   | Description                                      | Unit                          |
|------------|--------------------------------------------------|-------------------------------|
| $T$        | Air temperature                                  | °C                            |
| $Tbc, Tbf$ | Base temperature for chilling, forcing           | °C                            |
| $t$        | Time                                             | hour [h], day [d] or year [a] |
| $t_0$      | Start of the chilling period (dormancy)          | day of the year (DOY)         |
| $t_1$      | Chilling requirement completed, start of forcing | day of the year (DOY)         |
| $t_2$      | Forcing completed (BBCH 60, BBCH 65)             | day of the year (DOY)         |
| $Sc, Sf$   | State of chilling, state of forcing              | —                             |
| $Rc, Rf$   | Rate of chilling, rate of forcing                | —                             |
| $D$        | Daylength                                        | h                             |
| $a, b, c$  | Calibration parameters                           | —                             |
| $i, s, z$  | Index variables                                  | —                             |
| $\theta$   | Blossom frost risk                               | —                             |
| $\beta$    | Temperature threshold for blossom frost          | °C                            |

50 **Model parameters****Table 2. Model parameters (early ripeners, BBCH 65, area mean)**

| Model | $Tbc$<br>[°C] | $Sc$<br>[-] | $Tbf$<br>[°C] | $a$<br>[-] | $b$<br>[-] | $c$<br>[-] | $t_1$<br>[DOY]    | $t_2$<br>[DOY] |
|-------|---------------|-------------|---------------|------------|------------|------------|-------------------|----------------|
| 1     | —             | —           | 5.8           | —          | —          | —          | —                 | 122.6          |
| 2     | 3.0           | 36.9        | 5.0           | 220.9      | -0.0248    | —          | 12.1              | 120.4          |
| 3     | 2.5           | 37.8        | 3.1           | 201.3      | -0.0029    | —          | 17.4              | 121.9          |
| 4     | 4.2           | 37.7        | 7.4           | —          | —          | —          | 17.4              | 121.9          |
| 5     | —             | —           | 0.7           | —          | —          | 1.3        | <sup>a</sup> 30.1 | 122.9          |
| 6     | 4.8           | 33.4        | 5.2           | 232.1      | -0.0063    | 4.4        | 3.0               | 120.4          |
| 7     | 5.1           | 35.7        | 5.7           | 215.9      | -0.0033    | 5.7        | 8.0               | 119.2          |

<sup>a</sup>This model does not calculate the fulfillment of dormancy, but optimizes  $t_1$  as starting date for heat summation.
